# Supplementary material
Source: MDPI journal article supplement (https://www.mdpi.com/2075-163X/12/7/907)

Online Supplementary Material for:

# **Ion and Particle Size Effects on the Surface Reactivity of Anatase Nanoparticle–Aqueous Electrolyte Interfaces: Experimental, Density Functional Theory, and Surface Complexation Modeling Studies**

**Moira K. Ridley <sup>1,\*</sup>, Michael L. Machesky <sup>2</sup> and James D. Kubicki <sup>3</sup>**

<sup>1</sup> Department of Geosciences, Texas Tech University, Lubbock, Texas, 79409, USA; [moira.ridley@ttu.edu](mailto:moira.ridley@ttu.edu)

<sup>2</sup> 1506 Coral Cove Drive, Champaign, Illinois, 61821, USA; [machesky@illinois.edu](mailto:machesky@illinois.edu)

<sup>3</sup> Department of Earth, Environmental & Resource Sciences, The University of Texas at El Paso, El Paso, Texas, 79968, USA; [jdkubicki@utep.edu](mailto:jdkubicki@utep.edu)

\* Correspondence: [moira.ridley@ttu.edu](mailto:moira.ridley@ttu.edu)

**Table S1.** Fitting parameters for the SCM for each anatase sample, in each electrolyte media. The particle size are in nm, capacitance values are in units of farad per m<sup>2</sup>, also included are the MSC values.<sup>1</sup>

| Particle Size | Electrolyte Media | C <sub>1</sub> | Inner-sphere log K | Inner-sphere Complex | CD          | C <sub>2</sub> | Outer-sphere log K<br>$\equiv TiOH^{-0.3} \dots M^+$ | Outer-sphere log K<br>$\equiv Ti_2O^{-0.7} \dots M^+$ | Outer-sphere log K<br>$\equiv TiOH_2^{+0.7} \dots A^-$ | Outer-sphere log K<br>$\equiv Ti_2OH^{+0.3} \dots A^-$ | C <sub>s</sub> | MSC  |
|---------------|-------------------|----------------|--------------------|----------------------|-------------|----------------|------------------------------------------------------|-------------------------------------------------------|--------------------------------------------------------|--------------------------------------------------------|----------------|------|
| 4             | LiCl              | 0.9 ± 0.2      | -0.5 ± 0.6         | Bidentate, terminal  | 0.46 ± 0.71 | 3.9 ± 4.6      | -2.0                                                 | -0.31 ± 0.21                                          | -1.8                                                   | -0.4 ± 0.2                                             | 0.73           | 5.15 |
| 4             | NaCl              | 0.9 ± 0.2      | -1.3 ± 0.7         | Bidentate, bridged   | 0.36 ± 0.59 | 3.9 ± 3.3      | -2.0                                                 | -0.11 ± 0.08                                          | -1.8                                                   | -0.2 ± 0.09                                            | 0.73           | 4.10 |
| 4             | NaTr              | 0.9 ± 0.3      | -1.3 ± 2.8         | Bidentate, bridged   | 0.36 ± 1.9  | 3.9 ± 7.8      | -2.0                                                 | -0.11 ± 0.26                                          | -1.8                                                   | -1.3 ± 2.8                                             | 0.73           | 5.47 |
| 4             | KCl               | 0.9 ± 0.4      | -1.2 ± 2.1         | Tetradentate         | 0.55 ± 2.7  | 3.9 ± 8.1      | -2.0                                                 | -0.11 ± 0.12                                          | -1.8                                                   | -0.5 ± 0.2                                             | 0.73           | 4.83 |
| 4             | RbCl              | 0.9 ± 2.4      | -2.1 ± 10          | Tetradentate         | 0.50 ± 5.5  | 3.9 ± 45       | -2.0                                                 | -0.11 ± 0.17                                          | -1.8                                                   | -0.5 ± 0.2                                             | 0.73           | 5.37 |
| 20            | LiCl              | 1.2 ± 0.2      | -0.45 ± 0.6        | Bidentate, terminal  | 0.46 ± 0.64 | 3.0 ± 1.5      | -2.0                                                 | -0.31 ± 0.25                                          | -1.8                                                   | -0.5 ± 0.3                                             | 0.86           | 6.17 |
| 20            | NaCl              | 1.1 ± 0.1      | -1.3 ± 0.4         | Bidentate, bridged   | 0.36 ± 0.26 | 3.9 ± 1.2      | -2.0                                                 | -0.11 ± 0.07                                          | -1.8                                                   | -0.2 ± 0.1                                             | 0.86           | 4.89 |
| 20            | NaTr              | 1.1 ± 0.2      | -1.3 ± 2.1         | Bidentate, bridged   | 0.36 ± 1.3  | 3.9 ± 4.1      | -2.0                                                 | -0.11 ± 0.28                                          | -1.8                                                   | -0.7 ± 0.9                                             | 0.86           | 5.65 |
| 20            | KCl               | 1.3 ± 0.5      | -1.3 ± 2.0         | Tetradentate         | 0.55 ± 2.3  | 3.9 ± 4.8      | -2.0                                                 | -0.11 ± 0.10                                          | -1.8                                                   | -0.6 ± 0.2                                             | 0.97           | 4.81 |
| 20            | RbCl              | 1.1 ± 3.0      | -1.8 ± 7.8         | Tetradentate         | 0.50 ± 3.3  | 3.9 ± 38       | -2.0                                                 | -0.11 ± 0.24                                          | -1.8                                                   | -0.5 ± 0.3                                             | 0.86           | 5.21 |
| 40            | LiCl              | 1.5 ± 0.3      | -0.5 ± 0.7         | Bidentate, terminal  | 0.50 ± 0.66 | 3.0 ± 1.4      | -2.0                                                 | -1.50 ± 1.86                                          | -1.8                                                   | -0.2 ± 0.2                                             | 1.00           | 5.19 |
| 40            | NaCl              | 1.3 ± 0.2      | -1.3 ± 1.0         | Bidentate, bridged   | 0.36 ± 0.63 | 3.9 ± 1.8      | -2.0                                                 | -0.11 ± 0.13                                          | -1.8                                                   | -0.2 ± 0.1                                             | 0.97           | 4.36 |
| 40            | NaTr              | 1.2 ± 0.4      | -1.3 ± 2.4         | Bidentate, bridged   | 0.36 ± 1.4  | 3.9 ± 4.2      | -2.0                                                 | -0.11 ± 0.31                                          | -1.8                                                   | -0.5 ± 0.4                                             | 0.92           | 6.02 |
| 40            | KCl               | 1.3 ± 0.3      | -1.3 ± 1.6         | Tetradentate         | 0.50 ± 1.8  | 3.9 ± 3.2      | -2.0                                                 | -0.11 ± 0.08                                          | -1.8                                                   | -0.3 ± 0.1                                             | 0.97           | 5.53 |
| 40            | RbCl              | 1.1 ± 1.7      | -1.8 ± 4.6         | Tetradentate         | 0.50 ± 1.8  | 3.9 ± 21       | -2.0                                                 | -0.11 ± 0.16                                          | -1.8                                                   | -0.1 ± 0.1                                             | 0.86           | 5.14 |

<sup>1</sup> All log K values reflect infinite dilution. There are no error estimates for the outer-sphere log K  $\equiv TiOH^{-0.3} \dots M^+$  and log K  $\equiv TiOH_2^{+0.7} \dots A^-$  values because they were held constant for all data fitting.

**Figure S1.** Periodic model of anatase (101) surface with  $\text{Rb}^+$  as a bidentate surface complex following energy minimization. The cell stoichiometry is  $\text{Ti}_{48}\text{O}_{96} + 62\text{H}_2\text{O} + \text{Rb}^+ + \text{Cl}^-$ , in a  $15.224 \times 10.4516 \times 30.0 \text{ \AA}$  cell. Ti atoms are in gray, O atoms red, H atoms white, Rb ion purple, and Cl ion green.

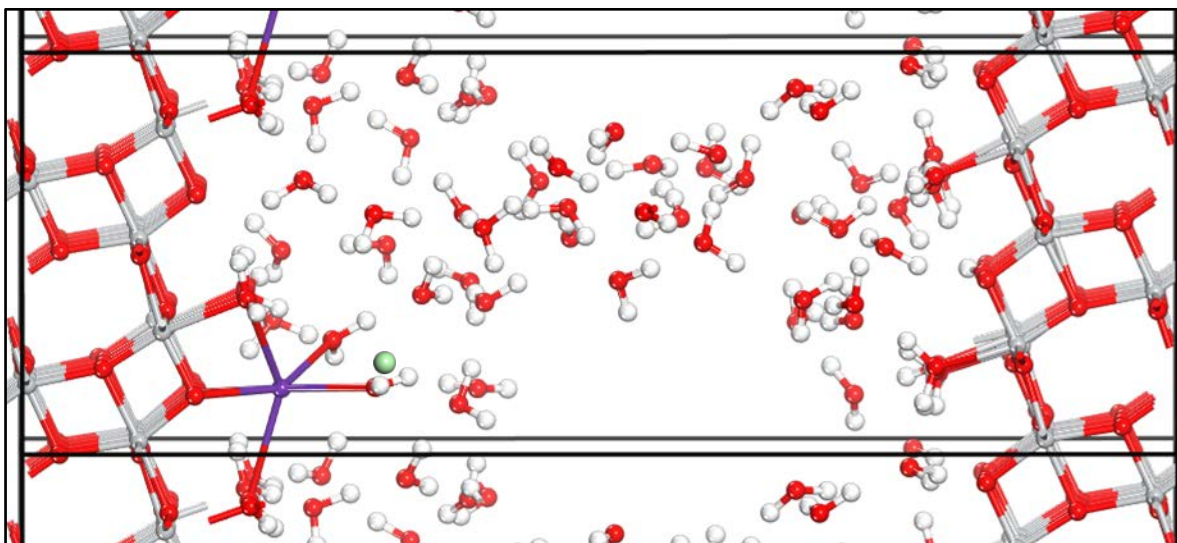

**Figure S2.** Effect of ionic strength on the distribution of surface species on the 4nm sized anatase sample. Data are presented for the inner-sphere (IS) and predominant outer-sphere (OS) electrolyte surface species, in NaCl media.

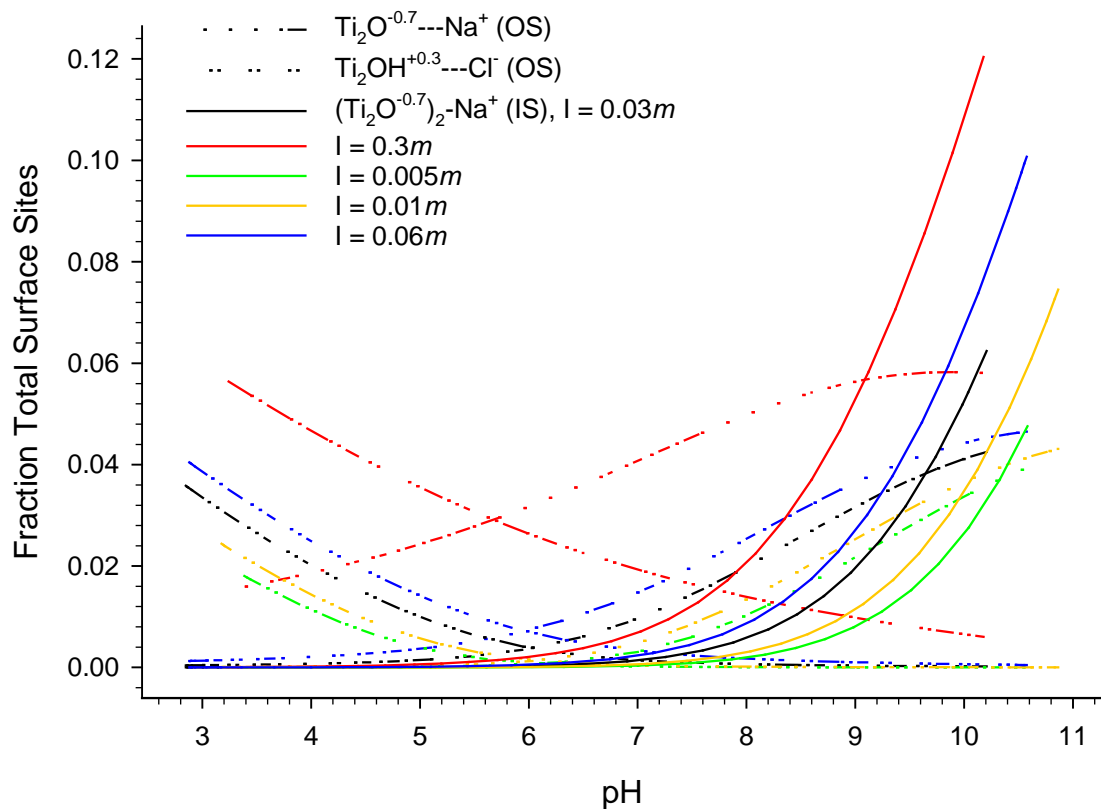

Supplement: s1 [file s1]
